# Supplementary material
Source: HighWire-hosted journal article supplement (https://www.jrheum.org/highwire/filestream/40789/field_highwire_adjunct_files/0/201551DataSuppl.pdf)
Supplement: 201551DataSuppl.pdf [file 201551DataSuppl.pdf]

Supplementary Table 1. Second and third line bDMARD Persistence

|                                 | N   | Median (months) | [95%CI]              |
|---------------------------------|-----|-----------------|----------------------|
| Second Line bDMARD Persistence: |     |                 |                      |
| Adalimumab                      | 359 | 15              | [13, 20]             |
| Golimumab                       | 218 | 34              | [23, 48]             |
| Infliximab                      | 43  | 21              | [13, 48]             |
| Secukinumab                     | 75  | 20              | [9, not yet reached] |
| Other                           | 73  | 12              | [9, 19]              |
| Third Line bDMARD Persistence*: |     |                 |                      |
| Adalimumab                      | 53  | 15              | [8, 20]              |
| Golimumab                       | 112 | 26              | [14, 40]             |
| Secukinumab                     | 110 | 10              | [6, 15]              |
| Certolizumab-pegol              | 53  | 10              | [7, 22]              |

[bDMARD; biologic disease modifying antirheumatic drug, CI; confidence interval]

\*Only included bDMARDs with patient numbers > n = 10 for third line persistence

## The Journal of Rheumatology

Supplementary Table 2. Demographics for the total first line treated population and the etanercept and adalimumab first line treated populations pre- and post-2012

|                                        | Overall treated population  |                             | Etanercept and adalimumab treated population only |                             |
|----------------------------------------|-----------------------------|-----------------------------|---------------------------------------------------|-----------------------------|
|                                        | Pre-2012                    | Post-2012                   | Pre-2012                                          | Post-2012                   |
| N                                      | 483                         | 2040                        | 394                                               | 1430                        |
| Age (years)                            |                             |                             |                                                   |                             |
| mean (SD)                              | 44.6 (12.9)                 | 44.1 (14.0)                 | 44.2 (12.7)                                       | 44.3 (13.7)                 |
| median                                 | 45.0                        | 43.0                        | 44.0                                              | 44.0                        |
| IQR                                    | 35, 53                      | 33, 54                      | 35, 52                                            | 33, 54                      |
| Age (years), n (% of column)           |                             |                             |                                                   |                             |
| 18 – 34                                | 115 (23.8%)                 | 574 (28.1%)                 | 97 (24.6%)                                        | 389 (27.2%)                 |
| 35 – 44                                | 124 (25.7%)                 | 521 (25.5%)                 | 104 (26.4%)                                       | 367 (25.7%)                 |
| 45 – 54                                | 141 (29.2%)                 | 455 (22.3%)                 | 118 (29.9%)                                       | 330 (23.1%)                 |
| 55 – 64                                | 64 (13.3%)                  | 304 (14.9%)                 | 44 (11.2%)                                        | 220 (15.4%)                 |
| 65 – 74                                | 32 (6.6%)                   | 153 (7.5%)                  | 25 (6.3%)                                         | 104 (7.3%)                  |
| 75+                                    | 7 (1.4%)                    | 33 (1.6%)                   | 6 (1.5%)                                          | 20 (1.4%)                   |
| Gender, n (% of column)                |                             |                             |                                                   |                             |
| Male                                   | 354 (73.3%)                 | 1118 (54.8%)                | 296 (75.1%)                                       | 799 (55.9%)                 |
| Female                                 | 129 (26.7%)                 | 904 (44.3%)                 | 98 (24.9%)                                        | 617 (43.1%)                 |
| Unassigned                             | 0 (1.0%)                    | 18 (0.9%)                   | 0 (0.0%)                                          | 14 (0.9%)                   |
| Time from onset (months), median IQR   | 69.6 (7.2, 182.5) [n = 402] | 16.1 (2.1, 86.3) [n = 1857] | 78.5 (8.7, 183.0) [n = 394]                       | 16.2 (3.0, 86.2) [n = 1312] |
| CRP (mg/L), median IQR                 | 5.0 (3.0, 12.0) [n = 245]   | 5.0 (2.0, 11.0) [n = 1782]  | 4.0 (1.6, 9.0) [n = 154]                          | 4.0 (1.8, 9.0) [n = 931]    |
| ESR (mm/hr), median IQR                | 7.0 (5.0, 15.0) [n = 239]   | 8.0 (5.0, 18.0) [n = 1768]  | 6.0 (4.0, 14.0) [n = 152]                         | 7.0 (4.0, 15.0) [n = 927]   |
| Baseline treatment combinations, n (%) |                             |                             |                                                   |                             |
| NSAIDs                                 | 203 (42.0%)                 | 1220 (59.8%)                | 163 (41.4%)                                       | 896 (62.7%)                 |
| cDMARDs                                | 93 (19.3%)                  | 510 (25.0%)                 | 68 (17.3%)                                        | 337 (23.6%)                 |
| Corticosteroids                        | 113 (23.4%)                 | 776 (38.0%)                 | 97 (24.6%)                                        | 540 (37.8%)                 |

[bDMARD; biologic disease modifying antirheumatic drugs, BASDAI; Bath Ankylosing Spondylitis Disease Activity Index, cDMARDs; conventional disease modifying antirheumatic drugs, CRP; C-reactive protein, ESR; erythrocyte sedimentation rate, IQR; interquartile range, NSAIDs; nonsteroidal anti-inflammatory drugs, SD; standard deviation]
